# Supplementary material for: On the Valorization of Arbutus unedo L. Pomace: Polyphenol Extraction and Development of Novel Functional Cookies
Source: MDPI journal article supplement (doi:10.3390/foods12193707), 2023-10-09
Supplement: s1 [file s1]

**Table S2.** Survey answers obtained from the sensory evaluation of cookies without seeds.

| Parameter                                                              | <i>n</i> | %  |
|------------------------------------------------------------------------|----------|----|
| <b>Country</b>                                                         |          |    |
| Spain                                                                  | 40       | 83 |
| Portugal                                                               | 8        | 17 |
| <b>Gender</b>                                                          |          |    |
| Masculine                                                              | 20       | 42 |
| Feminine                                                               | 28       | 58 |
| Non-binary                                                             | 0        | 0  |
| <b>Age</b>                                                             |          |    |
| 18-25                                                                  | 5        | 10 |
| 26-35                                                                  | 13       | 27 |
| 36-45                                                                  | 6        | 13 |
| 46-55                                                                  | 9        | 19 |
| 56-65                                                                  | 8        | 17 |
| >65                                                                    | 1        | 2  |
| <b>(1):0%; (2):20%; (3):15%; (4):40%; (5):60%</b>                      |          |    |
| <i>1. Visually, are there any cookie(s) that you find unpleasant?</i>  |          |    |
| None                                                                   | 28       | 49 |
| 1                                                                      | 6        | 11 |
| 2                                                                      | 5        | 9  |
| 3                                                                      | 6        | 11 |
| 4                                                                      | 3        | 5  |
| 5                                                                      | 9        | 16 |
| <i>2. On a visual level, which cookie do you find most unpleasant?</i> |          |    |
| 1                                                                      | 7        | 15 |
| 2                                                                      | 6        | 13 |
| 3                                                                      | 7        | 15 |
| 4                                                                      | 4        | 8  |
| 5                                                                      | 24       | 50 |
| <i>3. On a visual level, which cookie do you find most pleasant?</i>   |          |    |
| 1                                                                      | 19       | 40 |
| 2                                                                      | 5        | 10 |
| 3                                                                      | 13       | 27 |
| 4                                                                      | 7        | 15 |
| 5                                                                      | 4        | 8  |
| <i>4. Do you find the smell of any cookie(s) unpleasant?</i>           |          |    |
| None                                                                   | 23       | 38 |
| 1                                                                      | 1        | 2  |
| 2                                                                      | 3        | 5  |
| 3                                                                      | 1        | 2  |

|                                                                                                |    |    |
|------------------------------------------------------------------------------------------------|----|----|
| 4                                                                                              | 13 | 22 |
| 5                                                                                              | 19 | 32 |
| <i>5. Which cookie do you find most unpleasant by its smell?</i>                               |    |    |
| 1                                                                                              | 3  | 6  |
| 2                                                                                              | 1  | 2  |
| 3                                                                                              | 2  | 4  |
| 4                                                                                              | 9  | 19 |
| 5                                                                                              | 33 | 69 |
| <i>6. Which cookie do you find most pleasant by its smell?</i>                                 |    |    |
| 1                                                                                              | 15 | 31 |
| 2                                                                                              | 11 | 23 |
| 3                                                                                              | 18 | 38 |
| 4                                                                                              | 3  | 6  |
| 5                                                                                              | 1  | 2  |
| <i>7. Do you find the texture in your hand and/or mouth of any or some cookies unpleasant?</i> |    |    |
| None                                                                                           | 24 | 41 |
| 1                                                                                              | 4  | 7  |
| 2                                                                                              | 5  | 8  |
| 3                                                                                              | 3  | 5  |
| 4                                                                                              | 6  | 10 |
| 5                                                                                              | 17 | 29 |
| <i>8. Texturally, which cookie do you find the most unpleasant?</i>                            |    |    |
| 1                                                                                              | 4  | 8  |
| 2                                                                                              | 1  | 2  |
| 3                                                                                              | 1  | 2  |
| 4                                                                                              | 9  | 19 |
| 5                                                                                              | 33 | 69 |
| <i>9. Texturally, which cookie do you find the most pleasant?</i>                              |    |    |
| 1                                                                                              | 9  | 19 |
| 2                                                                                              | 9  | 19 |
| 3                                                                                              | 24 | 50 |
| 4                                                                                              | 2  | 4  |
| 5                                                                                              | 4  | 8  |
| <i>10. Is the taste of any or some cookies unpleasant to you?</i>                              |    |    |
| None                                                                                           | 17 | 27 |
| 1                                                                                              | 2  | 3  |
| 2                                                                                              | 2  | 3  |
| 3                                                                                              | 0  | 0  |
| 4                                                                                              | 16 | 25 |
| 5                                                                                              | 27 | 42 |
| <i>11. On a taste level, which cookie do you find most unpleasant?</i>                         |    |    |
| 1                                                                                              | 1  | 2  |

|                                                                              |    |    |
|------------------------------------------------------------------------------|----|----|
| 2                                                                            | 2  | 3  |
| 3                                                                            | 2  | 3  |
| 4                                                                            | 5  | 8  |
| 5                                                                            | 38 | 59 |
| <i>12. On a taste level, which cookie do you find most pleasant?</i>         |    |    |
| 1                                                                            | 12 | 25 |
| 2                                                                            | 11 | 23 |
| 3                                                                            | 20 | 42 |
| 4                                                                            | 2  | 4  |
| 5                                                                            | 3  | 6  |
| <i>13. Would you buy any cookies from 2-5? Select all that you would buy</i> |    |    |
| 2                                                                            | 31 | 65 |
| 3                                                                            | 41 | 85 |
| 4                                                                            | 11 | 23 |
| 5                                                                            | 6  | 13 |
| None                                                                         | 0  | 0  |
| All                                                                          | 0  | 0  |
