# Supplementary material for: On the Valorization of Arbutus unedo L. Pomace: Polyphenol Extraction and Development of Novel Functional Cookies
Source: MDPI journal article supplement (doi:10.3390/foods12193707), 2023-10-09
Supplement: s1 [file s1]

**Table S1.** Survey answers obtained from the sensory evaluation of cookies with seeds.

| Parameter                                                                          | <i>n</i> | %  |
|------------------------------------------------------------------------------------|----------|----|
| <b>Country</b>                                                                     |          |    |
| Spain                                                                              | 52       | 78 |
| Portugal                                                                           | 15       | 22 |
| <b>Gender</b>                                                                      |          |    |
| Masculine                                                                          | 32       | 48 |
| Feminine                                                                           | 35       | 52 |
| Non-binary                                                                         | 0        | 0  |
| <b>Age</b>                                                                         |          |    |
| 18-25                                                                              | 8        | 12 |
| 26-35                                                                              | 20       | 30 |
| 36-45                                                                              | 8        | 12 |
| 46-55                                                                              | 15       | 22 |
| 56-65                                                                              | 15       | 22 |
| >65                                                                                | 1        | 1  |
| <b>Test 1. 1 and 2: 0%; 3: 20%</b>                                                 |          |    |
| <i>1. Visually, do you find any cookies different from the rest?</i>               |          |    |
| 1                                                                                  | 4        | 6  |
| 2                                                                                  | 3        | 4  |
| 3                                                                                  | 56       | 84 |
| None                                                                               | 0        | 0  |
| All                                                                                | 4        | 6  |
| <i>2. Do you find any cookies different from the rest because of their smell?</i>  |          |    |
| 1                                                                                  | 7        | 10 |
| 2                                                                                  | 3        | 4  |
| 3                                                                                  | 49       | 73 |
| None                                                                               | 7        | 10 |
| All                                                                                | 1        | 1  |
| <i>3. Do you find any cookies different from the rest because of their flavor?</i> |          |    |
| 1                                                                                  | 6        | 9  |
| 2                                                                                  | 6        | 9  |
| 3                                                                                  | 45       | 67 |
| None                                                                               | 7        | 10 |
| All                                                                                | 3        | 4  |
| <i>4. Do you find any cookies different in texture in hand or mouth?</i>           |          |    |
| 1                                                                                  | 5        | 7  |
| 2                                                                                  | 3        | 4  |
| 3                                                                                  | 50       | 75 |
| None                                                                               | 9        | 13 |
| All                                                                                | 0        | 0  |

| <b>Test 2 (multiresponse). 1: 0%; 2: 10%; 3: 20%; 4: 15%; 5: 40%</b>                      |    |    |
|-------------------------------------------------------------------------------------------|----|----|
| <i>1. Visually, are there any cookie(s) that you find objectionable?</i>                  |    |    |
| 1                                                                                         | 0  | 0  |
| 2                                                                                         | 6  | 8  |
| 3                                                                                         | 6  | 8  |
| 4                                                                                         | 5  | 6  |
| 5                                                                                         | 17 | 22 |
| None                                                                                      | 43 | 56 |
| All                                                                                       | 0  | 0  |
| <i>2. Do you find the smell of any or some cookies unpleasant?</i>                        |    |    |
| 1                                                                                         | 2  | 3  |
| 2                                                                                         | 1  | 1  |
| 3                                                                                         | 5  | 7  |
| 4                                                                                         | 4  | 5  |
| 5                                                                                         | 25 | 33 |
| None                                                                                      | 39 | 51 |
| All                                                                                       | 0  | 0  |
| <i>3. Do you find the texture in hand and/or mouth of any or some cookies unpleasant?</i> |    |    |
| 1                                                                                         | 1  | 1  |
| 2                                                                                         | 8  | 9  |
| 3                                                                                         | 17 | 18 |
| 4                                                                                         | 15 | 16 |
| 5                                                                                         | 31 | 33 |
| None                                                                                      | 22 | 23 |
| All                                                                                       | 0  | 0  |
| <i>4. Is the taste of any or some cookies unpleasant to you?</i>                          |    |    |
| 1                                                                                         | 0  | 0  |
| 2                                                                                         | 3  | 4  |
| 3                                                                                         | 6  | 7  |
| 4                                                                                         | 8  | 10 |
| 5                                                                                         | 25 | 31 |
| None                                                                                      | 39 | 48 |
| All                                                                                       | 0  | 0  |
| <i>5. On a visual level, which cookie do you find most pleasing?</i>                      |    |    |
| 1                                                                                         | 18 | 27 |
| 2                                                                                         | 17 | 25 |
| 3                                                                                         | 12 | 18 |
| 4                                                                                         | 13 | 19 |
| 5                                                                                         | 7  | 10 |
| <i>6. On a visual level, which cookie do you find most unpleasing?</i>                    |    |    |
| 1                                                                                         | 9  | 13 |
| 2                                                                                         | 8  | 12 |

|                                                                              |    |    |
|------------------------------------------------------------------------------|----|----|
| 3                                                                            | 10 | 15 |
| 4                                                                            | 9  | 13 |
| 5                                                                            | 31 | 46 |
| <i>7. On an olfactory level, which cookie do you find most pleasant?</i>     |    |    |
| 1                                                                            | 17 | 25 |
| 2                                                                            | 13 | 19 |
| 3                                                                            | 11 | 16 |
| 4                                                                            | 17 | 25 |
| 5                                                                            | 9  | 13 |
| <i>8. On an olfactory level, which cookie do you find most unpleasant?</i>   |    |    |
| 1                                                                            | 6  | 9  |
| 2                                                                            | 3  | 5  |
| 3                                                                            | 4  | 6  |
| 4                                                                            | 4  | 6  |
| 5                                                                            | 47 | 73 |
| <i>9. In terms of texture, which cookie do you find more pleasant?</i>       |    |    |
| 1                                                                            | 19 | 28 |
| 2                                                                            | 18 | 27 |
| 3                                                                            | 12 | 18 |
| 4                                                                            | 15 | 22 |
| 5                                                                            | 3  | 4  |
| <i>10. In terms of texture, which cookie do you find more unpleasant?</i>    |    |    |
| 1                                                                            | 1  | 1  |
| 2                                                                            | 0  | 0  |
| 3                                                                            | 16 | 24 |
| 4                                                                            | 4  | 6  |
| 5                                                                            | 46 | 69 |
| <i>11. In terms of taste, which cookie do you find most pleasant?</i>        |    |    |
| 1                                                                            | 20 | 30 |
| 2                                                                            | 12 | 18 |
| 3                                                                            | 12 | 18 |
| 4                                                                            | 15 | 22 |
| 5                                                                            | 8  | 12 |
| <i>12. In terms of taste, which cookie do you find most unpleasant?</i>      |    |    |
| 1                                                                            | 9  | 13 |
| 2                                                                            | 2  | 3  |
| 3                                                                            | 7  | 10 |
| 4                                                                            | 4  | 6  |
| 5                                                                            | 45 | 67 |
| <i>13. Would you buy any cookies from 2-5? Select all that you would buy</i> |    |    |
| 2                                                                            | 44 | 35 |
| 3                                                                            | 33 | 26 |

---

|      |    |    |
|------|----|----|
| 4    | 36 | 28 |
| 5    | 9  | 7  |
| None | 1  | 1  |
| All  | 4  | 3  |

---
